# Supplementary material for: A new entry to Amaryllidaceae alkaloids from carbohydrates: total synthesis of (+)-vittatineElectronic Supplementary Information (ESI) available: experimental details. See http://www.rsc.org/suppdata/cc/b4/b402762k/
Source: Royal Society of Chemistry journal article supplement (doi:10.1039/b402762k), 2004-01-01
Supplement: b402762k.doc [file b402762k.doc]

# Electronic Supplementary Information

**A new entry to *Amaryllidaceae* alkaloids from carbohydrates:**

**total synthesis of (+)-vittatine**

**Masahiro Bohno, Hidetomo Imase, and Noritaka Chida***

*Department of Applied Chemistry, Faculty of Science and Technology, Keio University*,

*3-14-1 Hiyoshi, Kohoku-ku, Yokohama 223-8522*, *Japan*

**General Experimental Procedure.** Mps were determined on a Mitamura-riken micro hot stage and are uncorrected. 1H NMR spectra were measured with a JEOL JNM-GSX 270 (270 MHz), a JEOL JNM-*Lambda* 300 (300 MHz) or a varian MVX 300 (300 MHz) spectrometers, with tetramethylsilane as the internal standard for solutions in deuteriochloroform at rt, unless otherwise noted. 13C NMR spectra were taken on a JEOL JNM-*Lambda* 300 (75 MHz) or a varian MVX 300 (75 MHz) spectrometer in deutriochloroform at rt, unless otherwise noted. Mass spectra were measured by a JEOL GC-Mate spectrometer with EI mode (70 eV) or FAB (PEG 600 matrix) mode. Optical rotations were measured with a JASCO DIP-370 instrument with 1-dm tube and values of []D are recorded in units of 10–1 deg･cm2･g–1. IR spectra were taken with a JASCO FT/IR-200 spectrometer. Organic extracts were dried over Na2SO4 and concentrated below 40 °C under reduced pressure. Solvents were dried over 3Å molecular sieves after distillation. Toluene was distilled from CaH2. MeOH was distilled from CaSO4 (DRIERITE®). THF (dehydrated, stabilizer free) and CH2Cl2 (dehydrated) were purchased from Kanto Chemical Co., INC. For column chromatography, Merck silica gel 60 (230-400 mesh) was used, unless otherwise noted. For TLC analysis, Merck precoated TLC plates (silica gel 60 F254 on glass plates, 0.25 mm) were used.

**(1*S*,4*R*,6*S*)-6-Benzyloxy-4-(*tert*-butyldimethylsilyloxy)-1-[3’,4’-(methylenedioxy)phenyl]-**

**2-cyclohexen-1-ol (4) and its (1*R*) isomer (4’).**

To a solution of (4*R*,6*S*)-6-benzyloxy-4-(*tert*-butyldimethylsilyloxy)-2-cyclohexenone **3**1) (6.53 g, 19.6 mmol) in THF (325 mL) was slowly added 0.328 mol/L solution of 3,4-(methylenedioxy)phenylmagnesium bromide in THF (177 ml, 58.1 mmol) at -100°C under Ar. After being stirred at -100°C for 1h, the mixture was quenched with saturated aqueous NH4Cl solution at -100 °C. The mixture was diluted with EtOAc and washed successively with saturated aqueous NaHCO3 solution and brine, and then dried. Removal of the solvent gave a residue, which was purified by column chromatography (silica gel, 200 g, EtOAc/hexanes = 1/7 as eluent) to afford first **4’** (2.03 g, 23%) as a colorless syrup; [D22.8 -75 (*c* 0.81, CHCl3); max (neat) = 3530, 1505, 1490, 1245 and 940 cm-1;  (CDCl3, 300 MHz) 0.12 (6H, s), 0.93 (9H, s), 1.94-2.15 (2H, m), 3.29 (1H, s, OH), 3.58 (1H, dd, *J* = 3.4 and 11.0 Hz), 4.28 (1H, d, *J* = 11.7 Hz), 4.36 (1H, m), 4.44 (1H, d, *J* = 11.7 Hz), 5.64 (1H, dd, *J* = 9.99 and 1.95 Hz), 5.87 (1H, brd, *J* = 9.99 Hz), 5.97 (2H, s), 6.78 (1H, dd, *J* = 0.72 and 7.56 Hz), 6.88 (1H, dd, *J* = 1.95 and 7.56 Hz), 6.90 (1H, s) and 7.09~7.30 (5H, m); C (CDCl3, 75 MHz) -4.65, -4.56, 18.2, 25.8, 33.8, 67.1, 71.8, 78.0, 79.3, 101.0, 106.7, 107.7, 119.0, 127.7, 127.8, 128.2, 131.0, 134.2, 137.7, 139.7, 146.5 and 147.5; HRMS (FAB) Found : (M+H)+, 455.2242. C26H35O5Si requires (*M*+*H*), 455.2254. Found : (M+Na)+, 477.2066. C26H34O5NaSi requires (*M*+*Na*) 477.2074.

Further elution gave **4** as a colorless syrup (6.1 g, 68%); [D22.8 +144 (*c* 0.23, CHCl3); max (neat) = 3430, 1485, 1360, 1245, 1070 and 940 cm-1;  (CDCl3, 300 MHz) 0.00 and 0.02 (each 3H, 2s), 0.82 (9H, s), 1.51 (1H, ddd, *J* = 9.5, 12.7 and 12.9 Hz), 2.00 (1H, m), 2.11 (1H, brs), 3.57 (1H, dd, *J* = 3.18 and 12.9 Hz), 4.31 (1H, m), 4.68 (2H, s), 5.44 (1H, dd, *J* = 1.73 and 9.99 Hz), 5.73 (1H, d, *J* = 9.99 Hz), 5.88 (2H, s), 6.72 (1H, d, *J* = 8.3 Hz), 6.93 (1H, dd, *J* = 1.7 and 8.3 Hz,), 7.06 (1H, d, *J* = 1.7 Hz) and 7.18~7.28 (5H, m); C (CDCl3, 75 MHz) -4.65, -4.56, 18.1, 25.8, 36.0, 68.0, 72.4, 78.0, 80.2, 101.0, 107.2, 109.0, 121.7, 127.52, 127.55, 128.4, 131.6, 132.7, 134.9, 138.7, 146.9 and 147.2; HRMS (FAB) Found : (M+H)+, 455.2269. C26H35O5Si requires (*M*+*H*), 455.2254.

**(4*S*,6*R*)-4-Benzyloxy-6-(*tert*-butyldimethylsilyloxy)-3-[3’,4’-(methylenedioxy)phenyl]-**

**2-cyclohexen-1-one (5)**

To a solution of **4** (1.88 g, 4.14 mmol) in CH2Cl2 (150 mL) were added pyridinium chlorochromate (3.57 g, 16.5 mmol) and MS4A (7.5 g), and the reaction mixture was stirred at room temp. for 30 min. Removal of the solvent gave a residue, which was suspended in Et2O and the insoluble material was removed by filtration through a pad of Celite. The filtrate was concentrated to give crude ketone **5** (1.90 g), which was used for next reaction without further purification. The similar treatment of **4’** (0.63 g, 1.39 mmol) also afforded **5** (0.65 g). A small amount of **5** was purified by column chromatography (silica gel, 30 g, EtOAc/hexanes = 1/7 as eluent) and used as an analytical sample; m.p.131.5~132.5 °C;[D23.5 -142 (*c* 0.78, CHCl3); max (neat)= 1680, 1595, 1505, 1375 and 1260 cm-1;  (CDCl3, 300 MHz) 0.08 and 0.19 (each 3H, 2s), 0.92 (9H, s), 2.29 (1H, ddd, *J* = 10.2, 13.2 and 13.2 Hz), 2.71 (1H, ddd, *J* = 5.1, 5.1 and 13.2 Hz,), 4.25 (1H, dd, *J* = 5.1 and 13.2 Hz), 4.45 (1H, d, *J* = 11.2 Hz), 4.49 (1H, d, *J* = 11.2 Hz), 4.91 (1H, brdd, *J*= 5.1 and 10.2 Hz), 5.98 (2H, s), 6.15 (1H, brs), 6.79 (1H, d, *J*= 8.04 Hz), 6.88 (1H, s), 6.94 (1H, d, *J* = 8.04 Hz), 7.13 (2H, m) and 7.23~7.29 (3H, m); C (CDCl3, 75 MHz) -5.41, -4.38, 18.5, 25.8, 38.1, 69.5, 72.5, 72.9, 101.4, 107.7, 108.2, 121.7, 125.5, 127.9, 128.1, 128.4, 130.3, 137.1, 147.8, 148.8, 160.1 and 197.6; HRMS (FAB) Found : (M+H)+, 453.2091. C26H33O5Si requires (*M*+*H*), 453.2097.

**(1*R*,4*S*,6*R*)-4-Benzyloxy-6-(*tert*-butyldimethylsilyloxy)-3-[3’,4’-(methylenedioxy)phenyl]-**

**2-cyclohexen-1-ol (6).**

To a mixture of crude ketone **5** (2.55 g) in MeOH (50 mL) and CH2Cl2 (75 mL) were added CeCl3·7H2O (3.07 g, 8.24 mmol) and NaBH4 (218 mg, 5.76 mmol) at -78 °C, and the mixture was stirred at -78 °C for 30 min. The reaction mixture was diluted with H2O and products were extracted with EtOAc. The organic layer was washed successively with brine, and then dried. Removal of the solvent gave a residue, which was purified by column chromatography (silica gel, 120 g, EtOAc/hexanes = 1/10 as eluent) to afford **6** [1.87 g, 68% over all yield from a mixture of **4** and **4’** (*ca*. 3:1)]; [D19.0 -65 (*c* 0.665, CHCl3); max (neat) = 3440, 1505, 1490, 1250, 1220 and 840 cm-1; (CDCl3, 300 MHz) 0.14 (6H, s), 0.94 (9H, s), 1.89 (1H, ddd, *J*= 11.9, 11.9 and 11.9 Hz), 2.29 (1H, brd, *J* = 2.94 Hz), 2.39 (1H, ddd, *J*= 3.42, 6.09 and 11.9 Hz), 3.65 (1H, ddd, *J*= 3.42, 7.8 and 11.9 Hz), 4.28 (1H, brd, *J*= 7.8 Hz), 4.42 (2H, s), 4.70 (1H, m), 5.84 (1H, s), 5.96 (2H, s), 6.74~6.86 (3H, m), 7.10~7.16 (2H, m) and 7.20~7.30 (3H, m); C (CDCl3, 75 MHz) -4.6, -4.4, 18.1, 25.8, 36.3, 69.1, 73.3, 73.9, 74.2, 100.9, 107.4, 107.9, 120.4, 127.6, 128.0, 128.2, 128.5, 132.8, 137.9, 140.0, 146.9 and 147.4; HRMS (FAB) Found : (M+H)+, 455.2259. C26H35O5Si requires (*M*+*H*), 455.2254. Found : (M+Na)+, 477.2074. requires C26H34O5NaSi (*M*+*Na*), 477.2074. Futher elution gave C-1 epimer of **6** (0.17 g, 7%).

**{(1*S*,4*R*,6*S*)-1-[3’,4’-(Methylenedioxy)phenyl]-6-benzyloxy-4-(*tert*-butyldimethylsilyloxy)-**

**2-cyclohexenyl}acetic acid ethyl ester (7).**

To a solution of **6** (520 mg, 1.14 mmol) in triethyl orthoacetate (73 mL) were added propionic acid (73 l) and MS4A at room temp. and the mixture was stirred at 130 °C for 24 h. The mixture was filtrated through a pad of Celite and the filtrate was washed successively with saturated aqueous NaHCO3 solution and brine, and then dried. Removal of the solvent gave a residue, which was purified by column chromatography (silica gel, 40 g, EtOAc/hexanes = 1/15 as eluent) to afford **7** (358 mg, 60%) as a colorless syrup (found C, 68.63; H, 7.82. C30H40O6Si requires C, 68.67; H, 7.68%); [D22.0 -45 (*c* 0.89, CHCl3); max (neat) = 1730, 1490, 1340, 1070 and 1040 cm-1; (CDCl3, 300 MHz) -0.03 and 0.00 (each 3H, 2s), 0.81 (9H, s), 1.06 (3H, t, *J* = 6.95 Hz), 1.34 (1H, ddd, *J*= 9.03, 12.4 and 12.4 Hz), 1.92 (1H, ddd, *J* = 2.67 , 6.33 and 12.4 Hz), 2.74 and 2.81 (each 1H, 2d, *J* = 14.4 Hz), 3.64 (1H, dd, *J* = 2.67 and 12.4 Hz), 3.91 (2H, q, *J* = 6.95 Hz), 4.25 (1H, dd, *J* = 6.33 and 9.03 Hz), 4.42 and 4.60 (each 1H, 2d, *J* = 11.7 Hz), 5.63 and 5.78 (each 1H, 2d, *J* =10.2 Hz), 5.83 (2H, s), 6.66 (1H, d, *J* = 8.04 Hz), 6.84 (1H, dd, *J* = 1.71 and 8.04 Hz), 6.94 (1H, d, *J* = 1.71 Hz) and 7.15~7.30 (5H, m); C (CDCl3, 75 MHz) -4.62, -4.56, 14.1, 18.1, 25.8, 33.1, 42.1, 47.4, 60.0, 68.4, 71.3, 77.5, 100.8, 107.0, 110.3, 123.2, 127.5, 127.6, 128.3, 131.1, 132.8, 134.2, 138.6, 146.1, 146.9 and 171.2; HRMS (FAB) Found : (M+H)+, 525.2672. C30H40O6Si requires (*M*+*H*), 525.2672. Further elution gave recovered **6** (53 mg, 10%).

**2-{(1’*S*,4’*R*,6’*S*)-1’-[3’’,4’’-(Methylenedioxy)phenyl]-6’-benzyloxy-4’-(*tert*-butyldimethylsilyloxy)-2’-cyclohexenyl}ethanol (8).**

To a solution of **7** (578 mg, 1.10 mmol) in toluene (29 mL) was added diisobutylaluminum hydride (1.0 mol/L solution in toluene, 2.40 ml, 2.40 mmol) at 0 °C, and the reaction mixture was stirred at 0°C for 40 min. The mixture was quenched by the addition of H2O and extracted with EtOAc. The organic layer was washed successively with saturated aqueous NaHCO3 solution and brine, and then dried. Removal of the solvent gave a residue, which was purified by column chromatography (silica gel, 15 g, EtOAc/hexanes = 1/6 as eluent) to afford **8** (515 mg, 97%) as a colorless syrup; [D22.0 -23 (*c* 0.82, CHCl3); max (neat) = 3375, 1505, 1490, 1360, 1240, 1070 and 1040 cm-1; (CDCl3, 300 MHz) -0.03 and -0.01 (each 3H, 2s), 0.80 (9H, s), 1.31 (1H, dd, *J* = 12.5 and 12.5 Hz), 1.92 (2H, m), 2.10 (1H, ddd, *J*= 6.09 and 8.04 ,14.0 Hz), 3.30~3.44 (3H, m), 4.22 (1H, m), 4.33 and 4.59 (each 1H, d, *J* = 11.9 Hz), 5.51 (1H, dd, *J* = 1.47 and 9.99 Hz), 5.70 (1H, d, *J* = 9.99 Hz), 5.84 (2H, s), 6.65 (1H, d, *J* = 7.47 Hz), 6.88 (1H, dd, *J* = 1.47 and 7.47 Hz), 6.96 (1H, d, *J* = 1.47 Hz), 7.16 (1H, s) and 7.18~7.30 (4H, m); C (CDCl3, 75 MHz) -4.57, -4.48, 18.2, 25.9, 33.0, 40.6, 47.6, 59.6, 68.6, 71.1, 77.9, 100.8, 107.0, 110.5, 123.4, 127.6, 127.9, 128.4, 131.7, 132.7, 134.9, 138.6, 146.1 and 147.0; HRMS (FAB) Found : (M+H)+, 483.2568. C28H38O5Si requires (*M*+*H*), 483.2567. Found : (M+Na)+, 505.2381. C28H37O5NaSi requires (*M*+*Na*), 505.2387.

***N*-(*tert*-Butoxycarbonyl)-*N*-{2-(1’*S*,4’*R*,6’*S*)-1’-[3’’,4’’-(methylenedioxy)phenyl]-**

**6’-benzyloxy-4’-(*tert*-butyldimethylsilyloxy)-cyclohex-2’-enyl}ethyl-*N*-(*p*-toluenesulfonyl)-amine (9).**

To a solution of **8** (806 mg, 1.67 mmol) in THF (20 mL) were added *N*-(*tert*-butoxycarbonyl)-*p*-toluenesufonamide (681mg, 2.5 mmol), diethyl azodicarboxylate (527 mg, 3.35 mmol) and triphenyl phosphine (1.32g, 5.02 mmol) at room temp. After being stirred for 1h at room temp., the reaction mixture was diluted with EtOAc and washed successively with saturated aqueous NaHCO3 solution and brine, and then dried. Removal of the solvent gave a residue, which was purified by column chromatography (silica gel, 40 g, EtOAc/hexanes = 1/7 as eluent) to afford **9** (1.21 g, 98%) as a colorless syrup; [D24.1 -27 (*c* 0.845, CHCl3); max (neat) = 1730, 1600, 1360, 1240 and 1160 cm-1; (CDCl3, 300 MHz) 0.08 and 0.10 (each 3H, 2s), 0.91 (9H, s), 1.34 (9H, s), 1.44 (1H, ddd, *J* = 9.27, 12.2 and 12.2 Hz), 2.03 (1H, ddd, *J* = 1.95, 6.09 and 12.2 Hz), 2.19 (1H, ddd, *J* = 4.17, 11.9 and 11.9 Hz), 2.41 (3H, s), 2.55 (1H, ddd, *J* = 6.84, 11.9 and 11.9 Hz), 3.53 (1H, dd, *J* = 1.95 and 12.2 Hz), 3.64~3.86 (2H, m), 4.35 (1H, dd, *J* = 6.09 and 9.27 Hz), 4.58 and 4.71 (each 1H, 2d, *J* = 11.7 Hz), 5.75 and 5.88 (each 1H, 2d, *J* = 10.5 Hz), 5.92 (2H, d, *J* = 2.13 Hz), 6.76 and 6.98 (each 1H, 2d, *J* = 8.31 Hz), 7.12 (1H, s), 7.23~7.40 (7H, m) and 7.74 (2H, d, *J* = 8.31 Hz); C (CDCl3, 75 MHz) -4.66, -4.57, 18.1, 25.8, 27.8, 33.1, 37.3, 43.5, 47.5, 68.5, 71.4, 78.1, 84.0, 100.7, 106.9, 110.6, 123.5, 127.3, 127.6, 127.7, 128.2, 129.1, 130.7, 133.0, 134.0, 137.3, 138.5, 143.9, 146.1, 147.0 and 150.7; HRMS (FAB) Found : (M+H)+, 735.3269. C40H54NO8SSi requires (*M*+*H*), 735.3261.

***N*-(*tert*-Butoxycarbonyl)-*N*-{2-(1’*S*,4’*R*,6’*S*)-1’-[3’’,4’’-(methylenedioxy)phenyl]-**

**4’-(*tert*-butyldimethylsilyloxy)-2’-cyclohexenyl}ethyl-amine (10).**

A mixture of Na (37.5 mg, 1.63 mmol) and naphthalene (209 mg, 1.63 mmol) in THF (1.5 mL) was sonicated with ultrasound at room temp. for 15 min and the resulting suspension was cooled to -40 °C. To the mixture was added a solution of **9** (20.0 mg, 0.027 mmol) in THF (3.5 mL) at -40 °C via a cannula. The reaction mixture was stirred at -40°C for 1.5 h, and then quenched with H2O. The mixture was diluted with EtOAc, and washed successively with brine, and then dried. Removal of the solvent gave a residue, which was purified by column chromatography (silica gel, 5 g, EtOAc/hexanes = 1/4 as eluent) to afford **10** (10.3 mg, 77%) as a colorless syrup (found C, 63.43; H, 8.44. C26H41NO6Si requires C, 63.51; H, 8.40%); [D22.0 -23 (*c* 0.82, CHCl3); max (neat) = 3400, 1505, 1490, 1365, 1240, 1170 and 1040 cm-1; (CDCl3, 300 MHz) 0.07 and 0.09 (each 3H, 2s), 0.88 (9H, s), 1.42 (9H, s), 1.58 (1H, ddd, *J*= 7.8, 10.5 and 12.4 Hz), 1.9~2.2 (2H, m), 2.10 (1H, m), 2.96 (1H, m), 3.08 (1H, m), 3.72 (1H, m), 4.36 (1H, m), 4.48 (1H, brs), 5.74 (1H, d, *J* =10.2 Hz), 5.88 (1H, dd, *J* = 2.67 and 10.2 Hz), 5.94 (2H, d, *J* = 1.71 Hz), 6.79 (1H, d, *J* = 8.28 Hz), 6.86 (1H, dd, *J* = 1.44 and8.28 Hz) and 6.93 (1H, d, *J* = 1.44 Hz); C (CDCl3, 75 MHz) -4.72, 18.1, 22.6, 25.8, 28.4, 36.6, 38.0, 48.0, 67.0, 71.4, 79.2, 101.0, 107.8, 109.4, 122.3, 131.1, 132.1, 134.2, 146.3, 147.7, 155.8 and 158.9; HRMS (FAB) Found : (M+H)+, 492.2780. C26H42NO6Si requires (*M*+*H*), 492.2781. Found : (M+Na)+, 514.2611. C26H41NO6NaSi requires (*M*+*Na*), 514.2601.

**(3a*R*,4*S*,6*S*,7a*S*)-*N*-(*tert*-Butoxycarbonyl)-6-(*tert*-butyldimethylsilyloxy)-3a,4,5,6,7,7a-hexahydro-4-hydroxy-3a-[3’,4’-(methylenedioxy)phenyl]indoline (11).**

A solution of **10** (295 mg, 0.601 mmol) in THF (20 mL) was degassed by freeze-pump-thaw (FPT) cycles, which was added to a solution of mercury(II) trifluoroacetate (462 mg, 1.08 mmol) in THF (10 mL, degassed by FPT cycles) via a cannula. After being stirred at room temp. for 22 h, to the mixture was added a solution of NaBH4 (45mg , 1.20 mmol) and NaOH (48mg, 1.20 mmol) in MeOH (2.4 mL, degassed by FPT cycles) at room temp., and the resulting mixture was stirred for 10 min at room temp. The insoluble material was removed by filtration through a pad of Celite. The filtrate was concentrated to give a residue, which was purified by column chromatography (silica gel, 20 g, EtOAc/hexanes = 1/5 as eluent) to afford **11** (221 mg, 75%) as a colorless syrup; [D20.0 -17.5 (*c* 0.98, CHCl3); max (neat) = 3490, 1680, 1410, 1250, 1120 and 1040 cm-1; (CDCl3, 300 MHz, 50 °C) 0.12 and 0.16 (each 3H, 2s), 0.90 (9H, s), 1.40~1.60 (10H, m), 1.90~2.02 (2H, m), 2.05~2.22 (2H, m), 2.28~2.46 (1H, brs), 2.99 (1H, m), 3.29 (1H, m), 3.76 (1H, brd, *J* = 9.5 Hz), 4.18 (1H, brd, *J* = 9.5 Hz), 4.27 (1H, brs), 4.67 (1H, m), 5.92 (2H, d, *J* = 3.03 Hz) and 6.73~6.85 (3H, m); C (CDCl3, 75 MHz,50 °C) -5.31, -4.82, 18.0, 25.7, 28.7, 33.9 (br), 34.5 (br), 35.9 (br), 43.0 (br), 53.2, 68.7, 72.1, 79.3, 100.9, 107.2, 108.0, 119.3, 138.0, 145.8, 147.9, 154.1 and 160.1; HRMS (FAB) Found : (M+H)+, 492.2777. C26H42NO6Si requires (*M*+*H*), 492.2781.

**(3a*R*,6*S*,7a*S*)-*N*-(*tert*-Butoxycarbonyl)-6-(*tert*-butyldimethylsilyloxy)- 3a,6,7,7a-tetrahydro-3a-[3’,4’-(methylenedioxy)phenyl]indoline (12).**

To a solution of **11** (210 mg, 0.427 mmol) in THF (9.5 mL) were added sodium hydride (60% in oil, 51.2 mg, 1.28 mmol) and imidazole (2.9 mg, 0.04 mmol) at 0°C. After being stirred at 0°C for 30 min, to the mixture were added carbon disulfide (194 l, 3.20 mmol) and methyl iodide (53.0 L, 0.854 mmol) at 0°C and the resulting mixture was stirred at room temp. for 2 h. The mixture was diluted with EtOAc, and washed with brine, and then dried. Removal of the solvent gave a residue, which was purified by column chromatography (silica gel, 18 g, EtOAc/hexanes = 1/5 as eluent) to afford xanthate ester (241 mg, 97%) as a colorless syrup. To a solution of the xanthate ester (241 mg) in 1,2-dichlorobenzene (15.5 mL) was added potassium carbonate (85.8 mg, 0.414 mmol), and the mixture was stirred at 160 °C for 16 h under Ar. After cooling, the reaction mixture was diluted with EtOAc, and washed successively with saturated aqueous NaHCO3 solution and brine, and then dried. Removal of the solvent gave a residue, which was purified by column chromatography (silica gel, 7 g, EtOAc/hexanes = 1/7 as eluent) to afford **12** (160 mg, 82%) as a colorless syrup (found C, 65.98; H, 8.31. C26H39NO5Si requires C, 65.93; H, 8.30%); [D21.5 +99 (*c* 0.685, CHCl3); max (neat) = 1695, 1500, 1485, 1395, 1250 and 1040 cm-1; (CDCl3, 300 MHz, 45 °C) 0.09 and 0.10 (each 3H, 2s), 0.91 (9H, s), 1.40~1.55 (10H, m), 1.65 (1H, brs), 1.81 (1H, brdd, *J* = 5.1 and 11.7 Hz), 2.32 (1H, m), 3.21 (1H, m), 3.72 (1H, brs), 3.93 (1H, brs), 4.28 (1H, brs), 5.48 and 5.91 (each 1H, d, *J* =10.2 Hz), 5.94 (2H, s), 6.76 (1H, d, *J* = 8.0 Hz), 6.89 (1H, dd, *J* = 1.71 and 8.0 Hz) and 6.95 (1H, d, *J* = 1.71 Hz); C (CDCl3, 75 MHz, 45 °C) -4.54, 18.2, 26.0, 28.6, 32.4 (br), 36.0 (br), 45.7 (br), 50.7 (br), 62.3, 64.1, 79.4 (br), 101.1, 107.6, 108.0, 120.2, 131.9 (br), 133.0, 137.6 (br), 146.3 and 147.9; HRMS (FAB) Found : (M+H)+, 474.2667. C26H40NO5Si requires (*M*+*H*), 474.2676. Found : (M+Na)+, 496.2488. C26H39NO5NaSi requires (*M*+*Na*), 496.2496.

**(3a*R*,6*S*,7a*S*)-6-(*tert*-Butyldimethylsilyloxy)-3a,6,7,7a-tetrahydro-3a-[3’,4’-(methylenedioxy)phenyl]indoline (13).**

To a solution of **12** (120 mg, 0.254 mmol) in CH2Cl2 (10 mL) were added MS4A and BF3·Et2O (48.3 L, 0.381 mmol) at room temp. The reaction mixture was stirred at room temp. for 4 h. The mixture was diluted with CHCl3, and washed with brine, and then dried. Removal of the solvent gave a residue, which was purified by column chromatography (silica gel, 2 g, EtOAc/hexanes = 1/7 then MeOH/CHCl3 = 1/7 as eluents) to afford **13** (77 mg, 78%) as a colorless syrup; [D21.0 +41 (*c* 0.12, CHCl3); max (neat) = 1485, 1245, 1080, 1040 and 940 cm-1; (CDCl3, 300 MHz) 0.09 and 0.11 (each 3H, 2s), 0.90 (9H, s), 1.65 (1H, ddd, *J* = 3.18, 9.27 and 13.4 Hz), 1.96 (1H, ddd, *J* = 6.6, 6.6 and 13.1 Hz), 2.05 (1H, ddd, *J* = 5.1, 5.1 and 13.4 Hz), 2.40 (1H, ddd, *J* = 7.05, 7.05 and 13.1 Hz), 3.14 (2H, m (triplet like)), 3.42 (1H, m), 4.49 (1H, m, *J* = 5.1 Hz, *J* = 9.27 Hz), 5.58 (1H, d, *J* = 10.2 Hz), 5.83 (1H, brd, *J* = 10.2 Hz), 5.94 (2H, s), 6.75 (1H, d, *J* = 8.0 Hz), 6.86 (1H, dd, *J* = 1.71 and 8.0 Hz) and 6.92 (1H, d, *J* = 1.71 Hz); C (CDCl3, 75 MHz) -4.56, -4.51, 18.2, 25.9, 32.9, 40.0, 45.6, 49.6, 63.7, 64.6, 101.0, 107.6, 107.8, 120.0, 131.3, 133.1, 139.2, 145.9 and 147.7; HRMS (FAB) Found : (M+H)+, 374.2150. C21H32NO3Si requires (*M*+*H*), 374.2151. Further elution gave recovered **12** (16.8 mg, 14%).

**(+)-Vittatine (1).**

To a solution of **13** (76.7 mg, 0.199 mmol) in MeOH (0.5 mL) was added formaldehyde (37 wt .% solution in water, 0.9 mL). After being stirred at room temp. for 5 min, 6 mol/L aqueous HCl (1.9 mL) was added to the mixture. The resulting mixture was stirred at 50 °C for 15 h, and then made basic with solid potassium carbonate. The products were extracted with CHCl3 and the organic layer was washed successively with saturated aqueous NaHCO3 solution and brine, and then dried. Removal of the solvent gave a residue, which was purified by column chromatography (silica gel, 2 g, MeOH/CHCl3 = 1/5 as eluent) to give (+)-vittatine(27.3 mg, 51%) as a colorless solid; m.p.205~207 °C (lit. 2) 207~208 °C); [D22.0 +28 (*c* 0.46, CHCl3) {lit. 2) [D25.0+26 (*c* 0.5, CHCl3)]; max (neat) = 3300, 2900, 1485, 1235, 1040, 935 and 750 cm-1; (CDCl3, 300 MHz) 1.72 (1H, ddd, *J* = 3.9, 13.6 and 13.6 Hz), 1.93 (1H, ddd, *J* = 6.11, 10.7 and 12.3 Hz), 1.99 (1H, brd, *J* = 13.6 Hz), 2.17 (1H, ddd, *J* = 4.4, 9.03 and 12.3 Hz), 2.39 (1H, brs), 2.89 (1H, ddd, *J* = 6.11, 9.03 and 13.2 Hz), 3.35 (2H, m), 3.74 (1H, d, *J* = 16.6 Hz), 4.32 (1H, m), 4.36 (1H, d, *J* = 16.6 Hz), 5.89 and 5.87 (each 1H, brs), 5.95 (1H, dd, *J* = 5.13 and 9.9 Hz), 6.45 (1H, s), 6.57 (1H, d, *J* = 9.9 Hz) and 6.83 (1H, s) 1; (C5D5N, 300 MHz) 1.85 (1H, ddd, *J* = 4.1, 13.4 and 13.4 Hz), 1.95 (1H, ddd, *J* = 5.9, 9.3 and 9.9 Hz), 2.14 (1H, ddd, *J* = 5.1, 8.6 and 9.3 Hz), 2.31 (1H, brd, *J* = 13.4 Hz), 2.88 (1H, ddd, *J* = 5.9, 8.6 and 13.9 Hz), 3.42 (1H, ddd, *J* = 5.1, 9.9 and 13.9 Hz), 3.75~3.85 (1H, m), 3.80 and 4.40 (each 1H, 2d, *J* = 16.8 Hz), 4.54 (1H, brs), 5.97 (2H, s), 6.17 (1H, dd, *J* = 5.4 and 10.0 Hz), 6.51 (1H, s), 6.65 (1H, d, *J* = 10.0 Hz) and 7.05 (1H, s); C (C5D5N, 75 MHz) 33.4, 44.3, 44.4, 53.5, 62.2, 63.30, 63.34, 100.8, 103.2, 107.0, 126.7, 129.1, 130.7, 139.0, 145.8 and 146.2; HRMS (FAB) Found : (M+H)+, 272.1300. C16H18NO3 requires (*M*+*H*), 272.1287. Found : (M+Na)+ 294.1092. C16H17NO3Na requires (*M*+*Na*), 294.1106.

**Reference for Supplementary Information**

1. Preparation of cyclohexenone **3**: S. Imuta, S. Ochiai, M. Kuribayashi and N. Chida, *Tetrahedron Lett*., 2003, **44**, 5047.
2. H. -G. Boit and h. Ehmke, *Chem*. *Ber*., 1957, **90**, 369.
